# Supplementary material
Source: MDPI journal article supplement (https://www.mdpi.com/2073-4352/14/2/181)
Supplement: s1 [file s1]

## ASSOCIATED CONTENT

### Supporting Information

#### X-ray powder diffraction data

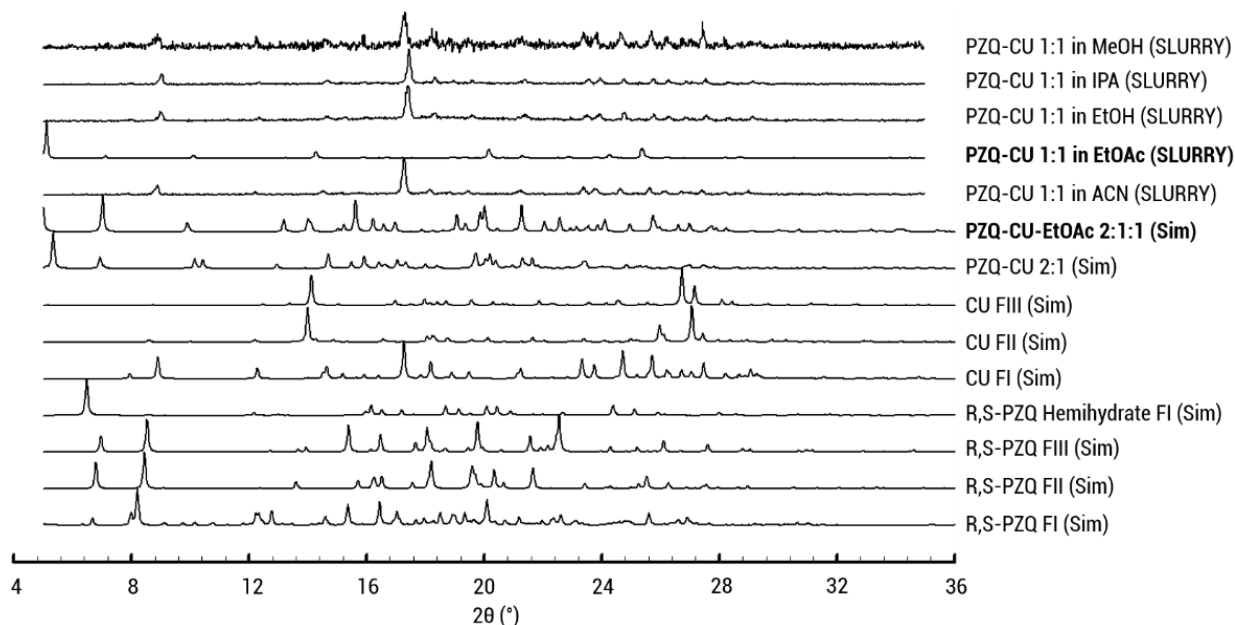

**Figure S1.** Normalized diffraction patterns. Simulated diffraction pattern of the known polymorphs (FI-III) and hemihydrate of the parent compounds racemic praziquantel and curcumin, praziquantel–curcumin cocrystal (PZQ-CU 2:1), and praziquantel–curcumin–ethyl acetate cocrystal solvate (PZQ-CU-EtOAc 2:1:1), and experimental patterns of the slurry sample powders obtained in acetonitrile (ACN), ethanol (EtOH), ethyl acetate (EtOAc), 2-propanol (IPA), and methanol (MeOH).

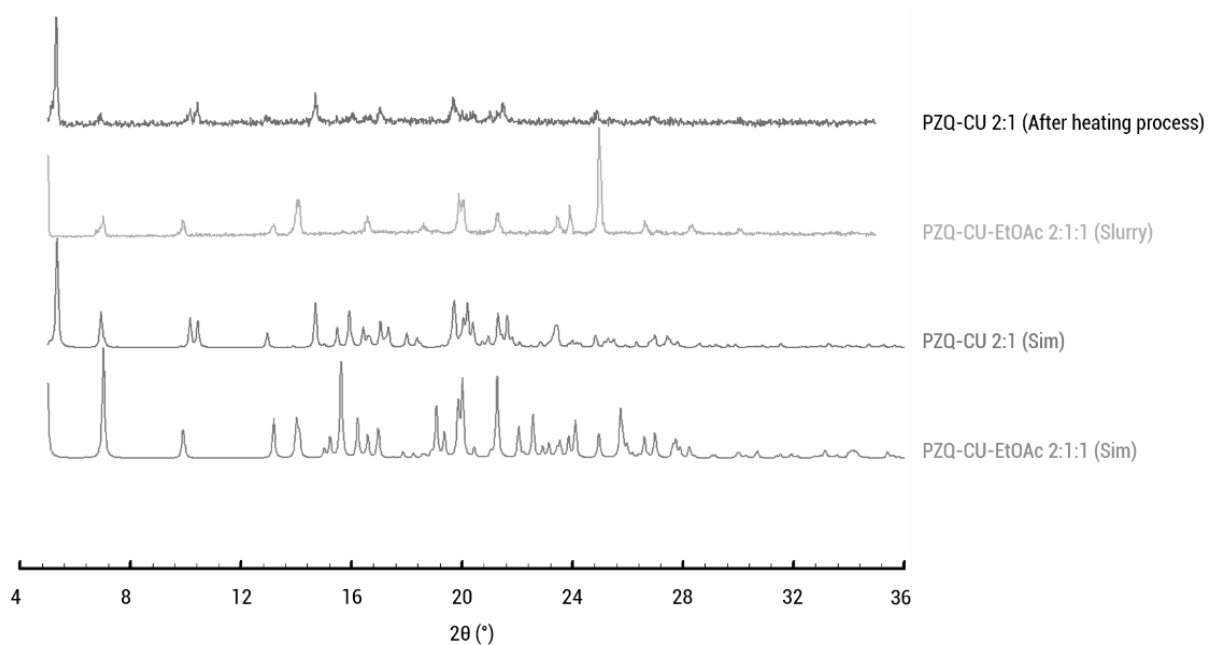

**Figure S2.** Normalized diffraction patterns. Simulated diffraction pattern of the praziquantel–curcumin cocrystal (PZQ-CU 2:1) and the praziquantel–curcumin–ethyl acetate cocrystal solvate (PZQ-CU-EtOAc 2:1:1), and the experimental patterns of the powders obtained after slurry in ethyl acetate and heating treatment (by DSC).

## Single crystal X-ray diffraction data

**Table S1.** Crystal data and structure refinement for PZQ–CU–EtOAc (2:1:1) and the desolvated PZQ-CU (2:1) cocrystal.

| Identification code                    | PZQ-CU-EtOAc (2:1:1)                                                | PZQ-CU (2:1)                                                     |
|----------------------------------------|---------------------------------------------------------------------|------------------------------------------------------------------|
| Empirical formula                      | C <sub>63</sub> H <sub>76</sub> N <sub>4</sub> O <sub>12</sub>      | C <sub>59</sub> H <sub>68</sub> N <sub>4</sub> O <sub>10</sub>   |
| Formula weight                         | 1081.27                                                             | 993.17                                                           |
| Temperature (K)                        | 150.0(2)                                                            | 297(2)                                                           |
| Wavelength (Å)                         | 0.71073                                                             | 0.71073                                                          |
| Crystal system                         | Monoclinic                                                          | Monoclinic                                                       |
| Space group                            | <i>C2/c</i>                                                         | <i>P2<sub>1</sub>/n</i>                                          |
| Unit cell dimensions (Å, °)            | a = 37.570(2)<br>b = 5.9187(3)<br>c = 26.6434(17)<br>β = 110.574(7) | a = 27.330(4)<br>b = 5.8708(7)<br>c = 35.486(7)<br>β = 111.06(2) |
| Volume Å <sup>3</sup>                  | 5546.6(6)                                                           | 5313.5(17)                                                       |
| Z                                      | 4                                                                   | 4                                                                |
| Density (calc.) mg.m <sup>-3</sup>     | 1.295                                                               | 1.242                                                            |
| Absorption coeff. mm <sup>-1</sup>     | 0.089                                                               | 0.085                                                            |
| F (000)                                | 2312                                                                | 2120                                                             |
| Crystal size mm <sup>3</sup>           | 0.50x 0.03 x 0.02                                                   | 0.35 x 0.06 x 0.02                                               |
| θ range for data collection (°)        | 3.267 to 25.242                                                     | 3.147 to 17.230                                                  |
| Reflections collected                  | 16301                                                               | 10776                                                            |
| Independent reflections                | 4976 [R(int) = 0.0924]                                              | 3128 [R(int) = 0.1496]                                           |
| Completeness to θ                      | 99.4 % (θ=25.242°)                                                  | 97.5 % (θ = 17.230°)                                             |
| Absorption correction                  | Semi-empirical from equivalents                                     |                                                                  |
| Max. and min. transmission             | 1.00 and 0.88                                                       | 1.00 and 0.75                                                    |
| Refinement method                      | Full-matrix least-squares on F <sup>2</sup>                         |                                                                  |
| Data/restraints/parameters             | 4976 / 204 / 511                                                    | 3128 / 635 / 660                                                 |
| Goodness-of-fit on F <sup>2</sup>      | 1.102                                                               | 1.099                                                            |
| Final R indices [I > 2σ <sub>I</sub> ] | R <sub>1</sub> = 0.0785, wR <sub>2</sub> = 0.1791                   | R <sub>1</sub> = 0.1265, wR <sub>2</sub> = 0.2385                |
| R indices (all data)                   | R <sub>1</sub> = 0.1129, wR <sub>2</sub> = 0.1981                   | R <sub>1</sub> = 0.2128, wR <sub>2</sub> = 0.2791                |
| Δρ max., min. (e.Å <sup>-3</sup> )     | 0.455, -0.308                                                       | 0.375 and -0.277                                                 |

**Table S2.** Crystal data and structure refinement for the PZQ–CU–EtOAc (2:1:1) cocrystal at room temperature.

| Identification code                        | PZQ-CU-EtOAc (2:1:1)                                                |
|--------------------------------------------|---------------------------------------------------------------------|
| Empirical formula                          | C <sub>63</sub> H <sub>76</sub> N <sub>4</sub> O <sub>12</sub>      |
| Formula weight                             | 1081.27                                                             |
| Temperature (K)                            | 297(2)                                                              |
| Wavelength (Å)                             | 0.71073                                                             |
| Crystal system                             | Monoclinic                                                          |
| Space group                                | <i>C2/c</i>                                                         |
| Unit cell dimensions (Å, °)                | a = 37.992(3)<br>b = 5.9769(5)<br>c = 26.8477(15)<br>β = 110.218(7) |
| Volume (Å <sup>3</sup> )                   | 5720.8(7)                                                           |
| Z                                          | 4                                                                   |
| Density (calculated) (g/cm <sup>3</sup> )  | 1.255                                                               |
| Absorption coefficient (mm <sup>-1</sup> ) | 0.087                                                               |
| F (000)                                    | 2312                                                                |
| Crystal size (mm <sup>3</sup> )            | 0.35x 0.06 x 0.02                                                   |
| Theta range for data collection (°)        | 3.234 to 25.514                                                     |
| Reflections collected                      | 14153                                                               |
| Independent reflections                    | 5310 [R(int) = 0.0341]                                              |
| Completeness to θ = 25.242° (%)            | 99.3                                                                |
| Absorption correction                      | Semi-empirical from equivalents                                     |
| Max. and min. transmission                 | 1.00 and 0.40                                                       |
| Refinement method                          | Full-matrix least-squares on F <sup>2</sup>                         |
| Data/restraints/parameters                 | 5310 / 204 / 511                                                    |
| Goodness-of-fit on F <sup>2</sup>          | 1.059                                                               |
| Final R indices [I > 2σ <sub>I</sub> ]     | R1 = 0.0515, wR2 = 0.1300                                           |
| R indices (all data)                       | R1 = 0.0750, wR2 = 0.1409                                           |
| Δρ max., min. (e.Å <sup>-3</sup> )         | 0.171, -0.142                                                       |

**Table S3.** Hydrogen bonds in the praziquantel–curcumin–ethyl acetate (2:1:1) cocrystal solvate and the desolvated praziquantel–curcumin (2:1) cocrystal.

| Descriptors    | Interatomic Distances (Å)                                            |            |           |         |              |              | Angles (°)     |
|----------------|----------------------------------------------------------------------|------------|-----------|---------|--------------|--------------|----------------|
|                | Donors                                                               | H $\cdots$ | Acceptors | D-H     | H $\cdots$ A | D $\cdots$ A | D-H $\cdots$ A |
| $D_1^1(2) \ b$ | Praziquantel–curcumin–ethyl acetate (2:1:1) cocrystal solvate (150K) |            |           |         |              |              |                |
|                | O12                                                                  | H12        | O23       | 0.93(4) | 1.73(4)      | 2.651(5)     | 171(4)         |
| $D_1^1(2) \ b$ | Praziquantel–curcumin–ethyl acetate (2:1:1) cocrystal solvate (RT)   |            |           |         |              |              |                |
|                | O12                                                                  | H12        | O23       | 0.89(3) | 1.79(3)      | 2.673(7)     | 175(3)         |
| $D_1^1(2) \ b$ | Desolvated praziquantel–curcumin (2:1) cocrystal                     |            |           |         |              |              |                |
|                | O12                                                                  | H12        | O23       | 0.82    | 1.81         | 2.634(18)    | 178            |
| $D_1^1(2) \ b$ | O12'                                                                 | H12'       | O23B      | 0.82    | 1.82         | 2.640(18)    | 179            |

CCDC 2309015-2309017 contains the supplementary crystallographic data for this paper. These data can be obtained free of charge from the Cambridge Crystallographic Data Centre via [www.ccdc.cam.ac.uk/structures](http://www.ccdc.cam.ac.uk/structures).

## Proton nuclear magnetic resonance ( $^1\text{H}$ NMR) data

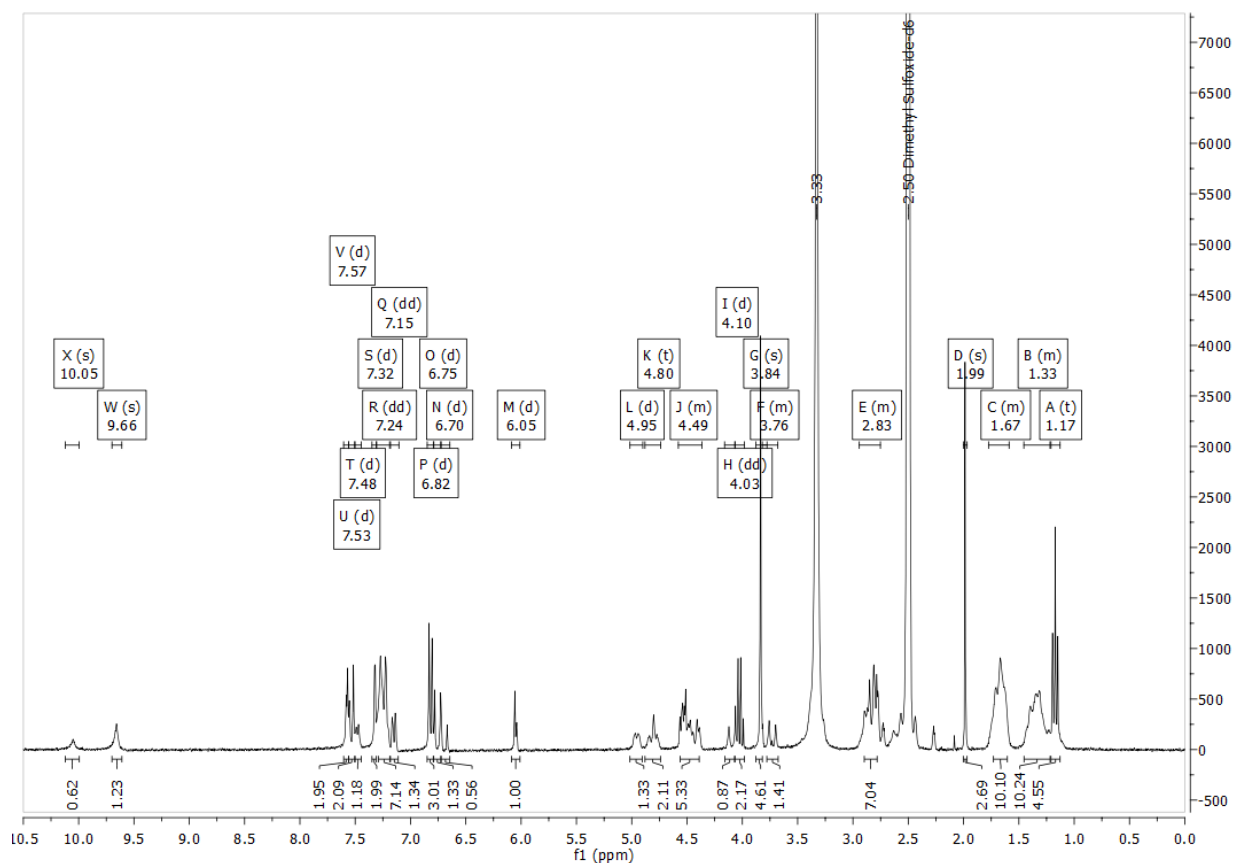

**Figure S3.** Proton NMR spectrum of the praziquantel–curcumin–ethyl acetate 2:1:1 cocrystal solvate obtained from the slurry experiment. The protons are colored in a shade of gray to match the corresponding products.  $^1\text{H}$  NMR (300 MHz,  $\text{DMSO-d}_6$ )  $\delta$  10.05 (s, 1H), 9.66 (s, 1H), 7.57 (d,  $J$  = 3.5 Hz, 2H), 7.53 (d,  $J$  = 11.0 Hz, 2H), 7.48 (d,  $J$  = 5.9 Hz, 1H), 7.32 (d,  $J$  = 1.5 Hz, 2H), 7.24 (dd,  $J$  = 14.7, 5.9 Hz, 7H), 7.15 (dd,  $J$  = 8.2, 1.7 Hz, 1H), 6.82 (d,  $J$  = 8.2 Hz, 3H), 6.75 (d,  $J$  = 15.9 Hz, 1H), 6.70 (d,  $J$  = 15.9 Hz, 1H), 6.05 (d,  $J$  = 5.1 Hz, 1H), 4.95 (d,  $J$  = 7.0 Hz, 1H), 4.80 (t,  $J$  = 9.7 Hz, 2H), 4.60 – 4.35 (m, 5H), 4.13 (d,  $J$  = 3.6 Hz, 1H), 4.03 (dd,  $J$  = 14.3, 7.1 Hz, 2H), 3.84 (s, 5H), 3.82 – 3.67 (m, 1H), 2.95 – 2.70 (m, 7H), 1.99 (s, 3H), 1.77 – 1.59 (m, 10H), 1.46 – 1.22 (m, 10H), 1.17 (t,  $J$  = 7.1 Hz, 5H).  $\delta$  3.33 residual water peak.  $\delta$  2.50  $\text{DMSO-d}_6$  peak.

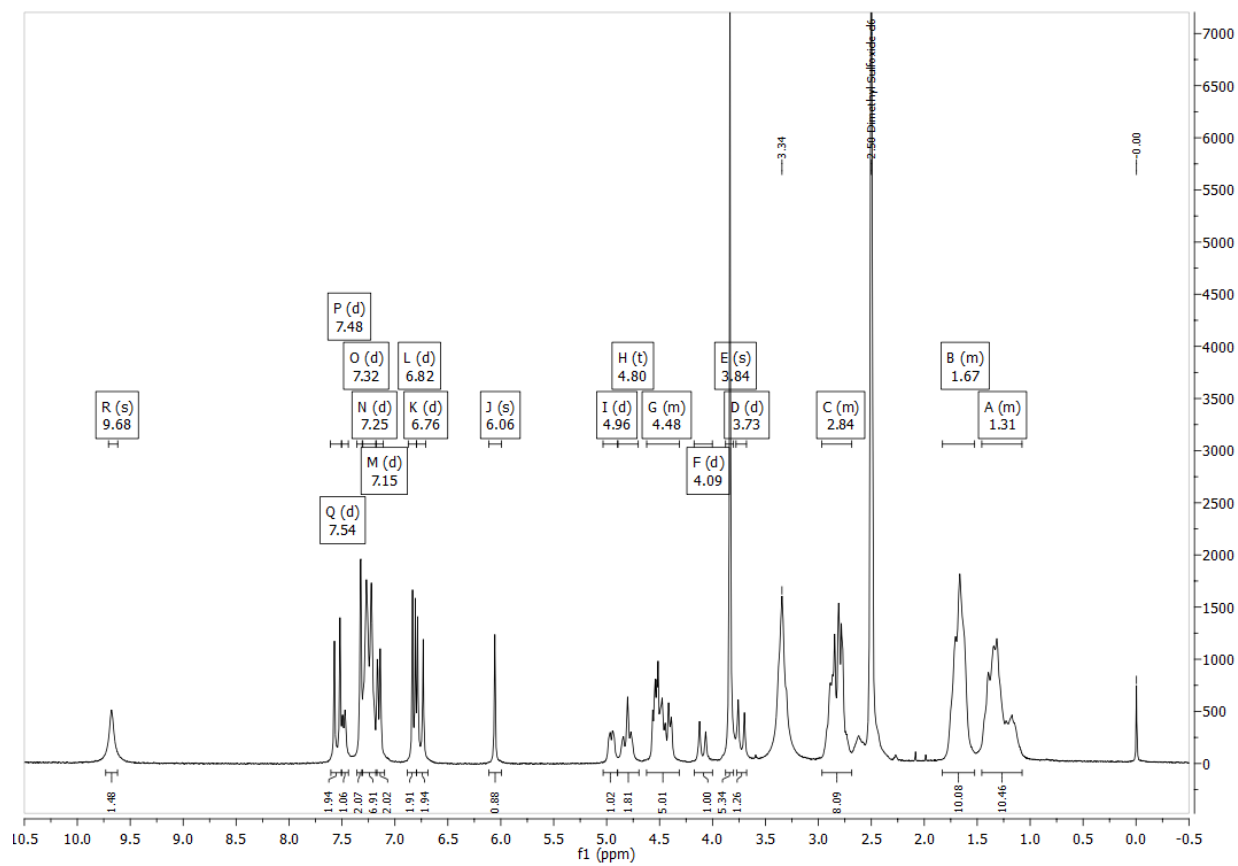

**Figure S4.** Proton NMR spectrum of the praziquantel–curcumin 2:1 cocrystal obtained from the slurry experiment. The protons are colored in a shade of gray to match the corresponding products.  $^1\text{H}$  NMR (300 MHz,  $\text{DMSO-d}_6$ )  $\delta$  9.68 (s, 1H), 7.54 (d,  $J$  = 15.8 Hz, 2H), 7.48 (d,  $J$  = 6.8 Hz, 1H), 7.32 (d,  $J$  = 1.0 Hz, 2H), 7.25 (d,  $J$  = 13.8 Hz, 7H), 7.15 (d,  $J$  = 8.2 Hz, 2H), 6.82 (d,  $J$  = 8.2 Hz, 2H), 6.76 (d,  $J$  = 15.8 Hz, 2H), 6.06 (s, 1H), 4.96 (d,  $J$  = 6.7 Hz, 1H), 4.80 (t,  $J$  = 10.5 Hz, 2H), 4.62 – 4.31 (m, 5H), 4.09 (d,  $J$  = 17.4 Hz, 1H), 3.84 (s, 5H), 3.73 (d,  $J$  = 17.7 Hz, 1H), 2.92 – 2.75 (m, 8H), 1.83 – 1.52 (m, 10H), 1.46 – 1.08 (m, 10H).  $\delta$  3.34 residual water peak.  $\delta$  2.50  $\text{DMSO-d}_6$  peak.
